# Supplementary material
Source: MDPI journal article supplement (https://www.mdpi.com/2077-0472/11/9/866)
Supplement: s1 [file s1]

**Comparative analysis of arbuscular mycorrhizal fungal communities between farmland and woodland in the black soil region of northeast China**

**Supplementary figure and tables**

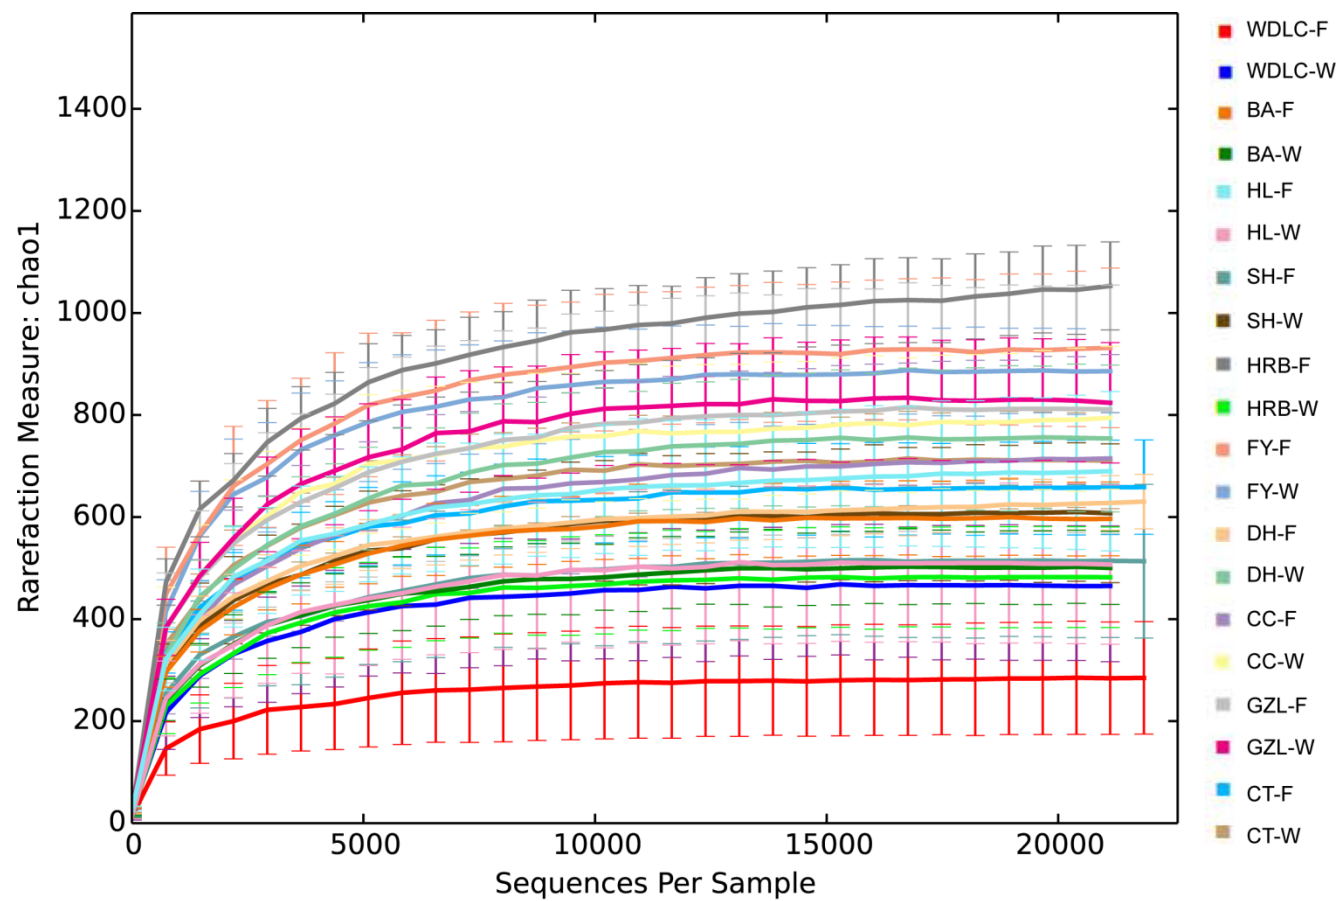

**Figure S1.** Rarefaction curves showing the Chao1 index of different samples. Different colors represent different farmland or woodland sampling sites (WDLC, Wudalianchi; BA, Beian; HL, Hailun; SH, Suihua; HRB, Harbin; FY, Fuyu; DH, Dehui; CC, Changchun; GZL, Gongzhuling; and CT, Changtu). F and W represent farmland and woodland respectively.

**Table S1** Pearson's correlation analysis between soil properties and glomalin-related soil protein (GRSP) in farmland or woodland.

|           | pH             |          | Total N        |          | Total P        |          | SOC            |          | Urease         |          | Invertase       |          |
|-----------|----------------|----------|----------------|----------|----------------|----------|----------------|----------|----------------|----------|-----------------|----------|
|           | <i>r</i>       | <i>P</i> | <i>r</i>        | <i>P</i> |
| Farmland  |                |          |                |          |                |          |                |          |                |          |                 |          |
| Total N   | -0.084         | 0.611    |                |          |                |          |                |          |                |          |                 |          |
| Total P   | -0.713         | 0.292    | <b>0.732**</b> | <0.001   |                |          |                |          |                |          |                 |          |
| SOC       | -0.070         | 0.671    | <b>0.907**</b> | <0.001   | <b>0.787**</b> | <0.001   |                |          |                |          |                 |          |
| Urease    | 0.149          | 0.367    | <b>0.376*</b>  | 0.018    | 0.303          | 0.060    | <b>0.352*</b>  | 0.028    |                |          |                 |          |
| Invertase | <b>0.678**</b> | <0.001   | -0.042         | 0.799    | -0.152         | 0.357    | -0.005         | 0.976    | -0.045         | 0.784    |                 |          |
| GRSP      | <b>-0.367*</b> | 0.021    | <b>0.350*</b>  | 0.029    | <b>0.506**</b> | 0.001    | <b>0.461**</b> | 0.003    | 0.024          | 0.885    | <b>-0.0326*</b> | 0.043    |
| Woodland  |                |          |                |          |                |          |                |          |                |          |                 |          |
| Total N   | -0.082         | 0.618    |                |          |                |          |                |          |                |          |                 |          |
| Total P   | 0.113          | 0.494    | <b>0.701**</b> | <0.001   |                |          |                |          |                |          |                 |          |
| SOC       | -0.009         | 0.956    | <b>0.922**</b> | <0.001   | <b>0.734**</b> | <0.001   |                |          |                |          |                 |          |
| Urease    | 0.270          | 0.097    | <b>0.445**</b> | 0.005    | <b>0.736**</b> | <0.001   | <b>0.449**</b> | 0.005    |                |          |                 |          |
| Invertase | -0.118         | 0.473    | 0.094          | 0.568    | 0.081          | 0.624    | 0.032          | 0.849    | <b>0.418**</b> | 0.008    |                 |          |
| GRSP      | -0.272         | 0.094    | <b>0.682**</b> | <0.001   | <b>0.590**</b> | <0.001   | <b>0.764**</b> | <0.001   | 0.241          | 0.140    | -0.044          | 0.792    |

SOC, soil organic carbon. Only significant correlations (\*  $P<0.05$ ; \*\*  $P<0.01$  by Turkey's test) were shown in bold number.

**Table S2** Relative abundance of arbuscular mycorrhizal fungal classes, orders, families at 20 sampling sites (WDLC, Wudalianchi; BA, Beian; HL, Hailun; SH, Suihua; HRB, Harbin; FY, Fuyu; DH, Dehui; CC, Changchun; GZL, Gongzhuling; and CT, Changtu). F and W represented farmland and woodland respectively. The value of relative abundance was calculated from mean of 4 samples at each sampling site.

|                      | WDLC  |       | BA    |       | HL    |       | SH    |       | HRB   |       | FY    |       | DH    |       | CC    |       | GZL   |       | CT    |       |
|----------------------|-------|-------|-------|-------|-------|-------|-------|-------|-------|-------|-------|-------|-------|-------|-------|-------|-------|-------|-------|-------|
| Orders               | F     | W     | F     | W     | F     | W     | F     | W     | F     | W     | F     | W     | F     | W     | F     | W     | F     | W     | F     | W     |
| Paraglomerales       | 39.30 | 52.14 | 53.97 | 84.93 | 23.37 | 86.16 | 32.25 | 52.47 | 40.71 | 90.76 | 42.30 | 59.08 | 48.63 | 78.05 | 52.69 | 54.16 | 53.19 | 46.78 | 30.58 | 44.30 |
| Glomerales           | 48.11 | 38.25 | 37.61 | 12.99 | 68.46 | 10.53 | 60.52 | 41.23 | 51.46 | 6.39  | 54.40 | 37.18 | 45.52 | 18.75 | 35.77 | 39.43 | 42.22 | 47.31 | 64.92 | 49.71 |
| Archaeosporales      | 4.83  | 4.60  | 4.18  | 1.06  | 2.12  | 0.90  | 2.11  | 1.53  | 1.31  | 2.43  | 1.10  | 1.61  | 1.27  | 0.51  | 2.83  | 2.13  | 1.18  | 2.12  | 2.00  | 2.08  |
| Diversisporales      | 0.25  | 0.44  | 1.46  | 0.05  | 0.34  | 0.21  | 0.21  | 0.11  | 0.31  | 0.06  | 0.05  | 0.10  | 0.48  | 0.16  | 0.14  | 0.10  | 0.17  | 0.17  | 1.06  | 0.30  |
| Families             |       |       |       |       |       |       |       |       |       |       |       |       |       |       |       |       |       |       |       |       |
| Paraglomeraceae      | 39.30 | 52.14 | 53.97 | 84.93 | 23.37 | 86.16 | 32.25 | 52.47 | 40.71 | 90.76 | 42.30 | 59.08 | 48.63 | 78.05 | 52.69 | 54.16 | 53.19 | 46.78 | 30.58 | 44.30 |
| Claroideoglomeraceae | 40.48 | 26.42 | 23.42 | 10.16 | 41.37 | 6.66  | 47.26 | 28.96 | 36.43 | 2.49  | 17.07 | 21.38 | 32.09 | 11.89 | 22.78 | 20.89 | 23.56 | 37.01 | 16.50 | 35.41 |
| Glomeraceae          | 7.63  | 11.82 | 14.19 | 2.83  | 27.09 | 3.87  | 13.26 | 12.28 | 15.03 | 3.90  | 37.33 | 15.79 | 13.43 | 6.86  | 12.99 | 18.54 | 18.67 | 10.29 | 48.41 | 14.30 |
| Archaeosporaceae     | 4.51  | 4.43  | 3.79  | 0.23  | 1.72  | 0.20  | 0.69  | 0.35  | 0.92  | 0.13  | 0.86  | 1.22  | 1.09  | 0.21  | 2.04  | 1.53  | 0.80  | 1.69  | 1.77  | 1.33  |
| Ambisporaceae        | 0.32  | 0.17  | 0.39  | 0.83  | 0.40  | 0.70  | 1.42  | 1.18  | 0.39  | 2.30  | 0.24  | 0.39  | 0.18  | 0.30  | 0.79  | 0.61  | 0.38  | 0.43  | 0.24  | 0.75  |
| Gigasporaceae        | 0.24  | 0.20  | 0.34  | 0.01  | 0.33  | 0.20  | 0.18  | 0.09  | 0.24  | 0.04  | 0.04  | 0.08  | 0.32  | 0.14  | 0.12  | 0.08  | 0.11  | 0.15  | 0.74  | 0.30  |
| Acaulosporaceae      | 0.01  | 0.18  | 1.01  | 0.03  | 0.00  | 0.01  | 0.04  | 0.01  | 0.02  | 0     | 0.00  | 0.01  | 0.14  | 0.01  | 0.02  | 0.01  | 0.05  | 0.01  | 0.06  | 0.00  |
| Diversisporaceae     | 0     | 0.05  | 0.11  | 0.01  | 0.01  | 0     | 0     | 0.01  | 0.05  | 0.02  | 0.00  | 0     | 0.03  | 0.01  | 0.00  | 0.00  | 0.00  | 0.01  | 0.25  | 0     |
| Others               | 7.51  | 4.57  | 2.78  | 0.97  | 5.71  | 2.20  | 4.90  | 4.66  | 6.21  | 0.36  | 2.15  | 2.04  | 4.10  | 2.53  | 8.57  | 4.17  | 3.24  | 3.63  | 1.45  | 3.62  |

**Table S3** Pearson's correlation analysis between relative abundance of arbuscular mycorrhizal fungal orders, families, genera and edaphic factors.

|                      | pH              |          | Total N         |          | Total P        |          | SOC             |          | Urease   |          | Invertase       |          | GRSP     |          |
|----------------------|-----------------|----------|-----------------|----------|----------------|----------|-----------------|----------|----------|----------|-----------------|----------|----------|----------|
|                      | <i>r</i>        | <i>P</i> | <i>r</i>        | <i>P</i> | <i>r</i>       | <i>P</i> | <i>r</i>        | <i>P</i> | <i>r</i> | <i>P</i> | <i>r</i>        | <i>P</i> | <i>r</i> | <i>P</i> |
| Orders               |                 |          |                 |          |                |          |                 |          |          |          |                 |          |          |          |
| Paraglomerales       | <b>0.357**</b>  | 0.001    | <b>0.238*</b>   | 0.036    | -0.057         | 0.620    | 0.200           | 0.081    | -0.022   | 0.849    | <b>0.431**</b>  | <0.001   | 0.031    | 0.787    |
| Glomerales           | <b>-0.334**</b> | 0.003    | <b>-0.279*</b>  | 0.013    | 0.018          | 0.879    | <b>-0.234*</b>  | 0.040    | 0.001    | 0.991    | <b>-0.432**</b> | <0.001   | -0.035   | 0.759    |
| Archaeosporales      | -0.125          | 0.274    | 0.175           | 0.126    | <b>0.287*</b>  | 0.011    | 0.139           | 0.228    | 0.139    | 0.226    | -0.131          | 0.252    | -0.044   | 0.703    |
| Diversisporales      | <b>-0.287*</b>  | 0.011    | -0.091          | 0.430    | 0.008          | 0.943    | -0.115          | 0.319    | 0.063    | 0.584    | <b>-0.395**</b> | <0.001   | -0.170   | 0.137    |
| Families             |                 |          |                 |          |                |          |                 |          |          |          |                 |          |          |          |
| Paraglomeraceae      | <b>0.357**</b>  | 0.01     | <b>0.238*</b>   | 0.036    | -0.057         | 0.620    | 0.200           | 0.081    | -0.022   | 0.849    | <b>0.431**</b>  | <0.001   | 0.031    | 0.787    |
| Claroideoglomeraceae | <b>-0.306**</b> | 0.006    | -0.030          | 0.795    | 0.199          | 0.081    | 0.030           | 0.798    | 0.010    | 0.933    | <b>-0.369**</b> | 0.001    | 0.142    | 0.213    |
| Glomeraceae          | -0.151          | 0.187    | <b>-0.380**</b> | 0.001    | -0.197         | 0.083    | <b>-0.380**</b> | 0.001    | -0.009   | 0.938    | <b>-0.225*</b>  | 0.048    | -0.213   | 0.062    |
| Archaeosporaceae     | -0.171          | 0.134    | 0.191           | 0.094    | <b>0.304**</b> | 0.007    | 0.151           | 0.190    | 0.175    | 0.126    | -0.188          | 0.100    | -0.038   | 0.741    |
| Ambisporaceae        | 0.100           | 0.385    | -0.028          | 0.806    | -0.022         | 0.845    | -0.020          | 0.865    | -0.077   | 0.502    | 0.126           | 0.272    | -0.018   | 0.879    |
| Gigasporaceae        | <b>-0.349**</b> | 0.002    | -0.123          | 0.282    | -0.060         | 0.599    | -0.146          | 0.205    | -0.039   | 0.734    | <b>-0.397**</b> | <0.001   | -0.064   | 0.580    |

|                        |                 |       |                 |        |                |       |                 |       |        |       |                 |        |               |       |
|------------------------|-----------------|-------|-----------------|--------|----------------|-------|-----------------|-------|--------|-------|-----------------|--------|---------------|-------|
| Acaulosporaceae        | -0.116          | 0.311 | -0.003          | 0.981  | 0.085          | 0.459 | -0.022          | 0.852 | 0.109  | 0.340 | <b>-0.238*</b>  | 0.036  | -0.151        | 0.187 |
| Diversisporaceae       | -0.199          | 0.080 | -0.139          | 0.226  | -0.084         | 0.464 | -0.145          | 0.208 | 0.056  | 0.624 | <b>-0.232*</b>  | 0.041  | -0.197        | 0.083 |
| Genera                 |                 |       |                 |        |                |       |                 |       |        |       |                 |        |               |       |
| <i>Paraglomus</i>      | <b>0.357**</b>  | 0.001 | <b>0.238*</b>   | 0.036  | -0.057         | 0.620 | 0.200           | 0.081 | -0.022 | 0.849 | <b>0.431**</b>  | <0.001 | 0.031         | 0.787 |
| <i>Claroideoglomus</i> | <b>-0.306**</b> | 0.006 | -0.030          | 0.795  | 0.199          | 0.081 | 0.030           | 0.798 | 0.010  | 0.933 | <b>-0.369**</b> | 0.001  | 0.142         | 0.213 |
| <i>Glomus</i>          | -0.150          | 0.191 | <b>-0.384**</b> | 0.001  | -0.200         | 0.079 | <b>-0.385**</b> | 0.001 | -0.009 | 0.936 | <b>-0.225*</b>  | 0.047  | -0.214        | 0.060 |
| <i>Archaeospora</i>    | -0.171          | 0.134 | 0.191           | 0.094  | <b>0.304**</b> | 0.007 | 0.151           | 0.190 | 0.175  | 0.126 | -0.188          | 0.100  | -0.038        | 0.741 |
| <i>Ambispora</i>       | 0.100           | 0.385 | -0.028          | 0.806  | -0.022         | 0.845 | -0.020          | 0.865 | -0.077 | 0.502 | 0.126           | 0.272  | -0.018        | 0.879 |
| <i>Gigaspora</i>       | <b>-0.366**</b> | 0.001 | -0.087          | 0.449  | -0.028         | 0.807 | -0.146          | 0.206 | 0.090  | 0.433 | <b>-0.376**</b> | 0.001  | -0.196        | 0.085 |
| <i>Scutellospora</i>   | -0.194          | 0.089 | -0.110          | 0.337  | -0.068         | 0.552 | -0.088          | 0.446 | -0.151 | 0.186 | <b>-0.261*</b>  | 0.021  | 0.093         | 0.416 |
| <i>Acaulospora</i>     | -0.116          | 0.311 | -0.003          | 0.981  | 0.085          | 0.459 | -0.022          | 0.852 | 0.109  | 0.340 | <b>-0.238*</b>  | 0.036  | -0.151        | 0.187 |
| <i>Septoglomus</i>     | -0.067          | 0.559 | 0.131           | 0.254  | 0.089          | 0.440 | 0.175           | 0.127 | 0.010  | 0.929 | 0.001           | 0.993  | 0.062         | 0.589 |
| <i>Diversispora</i>    | -0.205          | 0.072 | -0.160          | 0.162  | -0.102         | 0.373 | -0.166          | 0.150 | 0.046  | 0.686 | <b>-0.239*</b>  | 0.035  | -0.210        | 0.065 |
| <i>Redeckera</i>       | 0.099           | 0.388 | <b>0.391**</b>  | <0.001 | <b>0.332**</b> | 0.003 | <b>0.379**</b>  | 0.001 | 0.178  | 0.120 | 0.119           | 0.298  | <b>0.235*</b> | 0.038 |

---

SOC, soil organic carbon; GRSP, glomalin-related soil protein. Only significant correlations (\*  $P<0.05$ ; \*\*  $P<0.01$  by Turkey's test) were shown in bold number.
